# Supplementary material for: Unveiling the electronic and magnetic landscape of 3d transition metal doped hydrogenated borophenes: a first-principles study
Source: Royal Society of Chemistry journal article supplement (doi:10.1039/d4cp02644f), 2024-01-01
Supplement: d4cp02644f1.pdf [file d4cp02644f1.pdf]

## Supplementary Materials

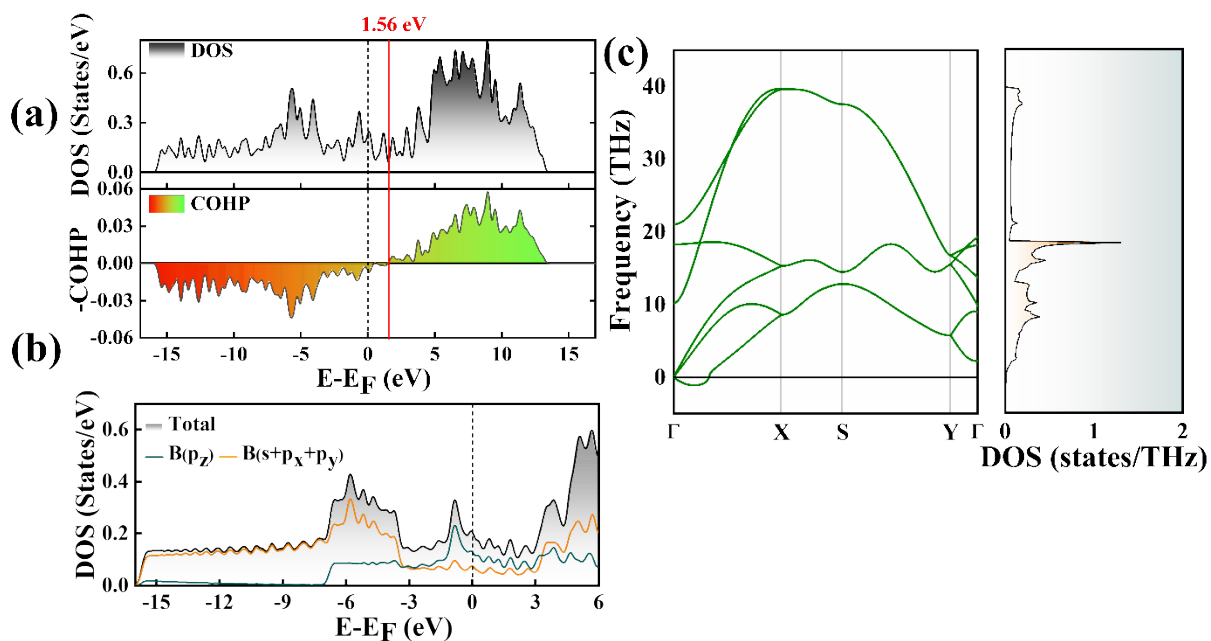

**Fig. S1.** (a) COHP and total DOS curve, (b) PDOS with in-plane  $s+p_x+p_y$ , out of plane  $p_z$ -state of B and s-state of H atom and (c) Phonon band dispersion and phonon Density of states of 2-Pmmn Borophene.

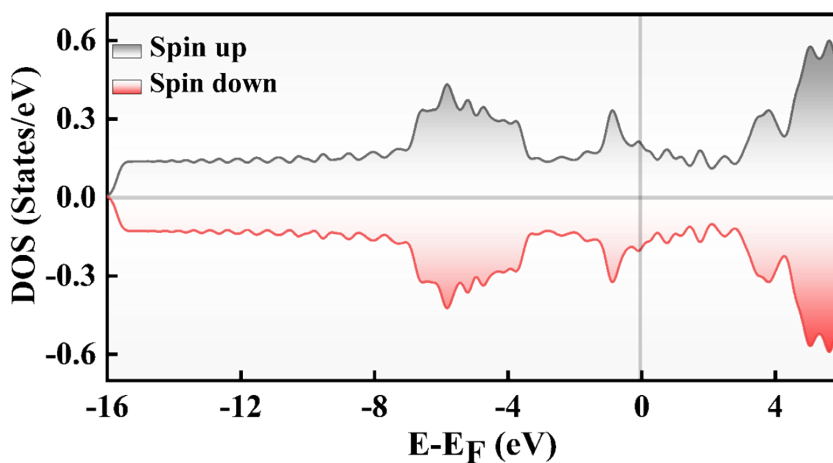

**Fig. S2.** The total Density of States (DOS) of spin-up and spin-down states of borophene

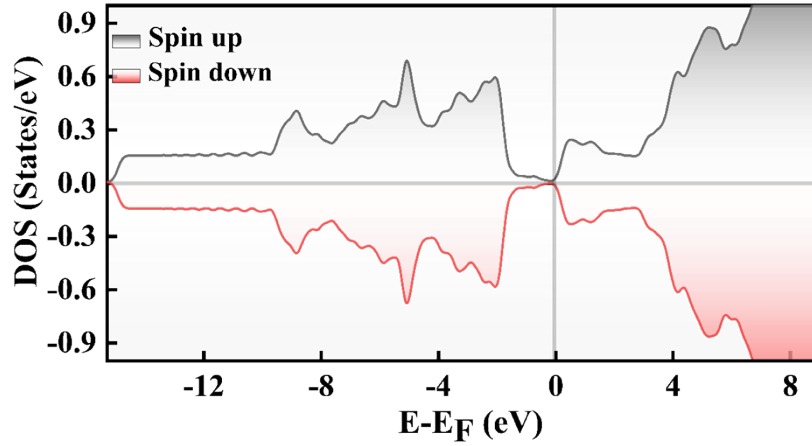

**Fig. S3.** The total Density of States (DOS) of spin-up and spin-down states of hydrogenated borophene

**Table S1.** The spin up and spin down electron contribution in  $d_{xy}$  and  $d_{x^2-y^2}$  orbitals of doped atom.

| Dopant    | $d_{xy}$  | $d_{x^2-y^2}$ | $d_{xy}$    | $d_{x^2-y^2}$ | Spin Polarization |
|-----------|-----------|---------------|-------------|---------------|-------------------|
|           | (Spin Up) | (Spin Up)     | (Spin Down) | (Spin Down)   |                   |
| <b>V</b>  | 0.9854    | 0.2022        | 0.0093      | 0.0699        | Isotropic         |
| <b>Cr</b> | 0.9866    | 0.9281        | 0.0045      | 0.0420        | Isotropic         |
| <b>Mn</b> | 0.9958    | 0.9646        | 0.0153      | 0.1345        | Isotropic         |
| <b>Fe</b> | 0.9790    | 0.9391        | 0.9487      | 0.0710        | Anisotropic       |
| <b>Co</b> | 0.9824    | 0.9528        | 0.9683      | 0.0964        | Anisotropic       |
| <b>Ni</b> | 0.9795    | 0.9539        | 0.9740      | 0.8264        | Anisotropic       |

## Supporting Data

**Table S2.** Lattice Parameters and Atomic Positions of Borophene and Hydrogenated

*Borophene*

| Structure           | Lattice Parameter                                                           | Atomic Position                                                                                                                     |
|---------------------|-----------------------------------------------------------------------------|-------------------------------------------------------------------------------------------------------------------------------------|
| <b>Borophene</b>    | 1.617975850 0.000000000 0.000000000                                         | B 0.4044939630 0.7155743232 12.5488840239                                                                                           |
| <b>2-Pmmn</b>       | 0.000000000 2.862297290 0.000000000<br>0.000000000 0.000000000 25.992524132 | B 1.2134818879 2.1467229686 13.4434711783                                                                                           |
| <b>Hydrogenated</b> | 1.945126968 0.000000000 0.000000000                                         | B 0.4862593083 0.7032523303 12.5921950618                                                                                           |
| <b>Borophene</b>    | 0.000000000 2.813012944 0.000000000<br>0.000000000 0.000000000 25.992524132 | H 0.4862598600 0.7032523303 11.4122231213<br>B 1.4588226403 2.1097569900 13.4001603047<br>H 1.4588238566 2.1097569900 14.5801319166 |
